# Supplementary material for: Which cuff should I use? Indirect blood pressure measurement for the diagnosis of hypertension in patients with obesity: a diagnostic accuracy review
Source: PubMed Central journal article supplement — BMJ Open. 2016 Nov 3;6(11):e012429. doi: 10.1136/bmjopen-2016-012429 (PMC5129068; doi:10.1136/bmjopen-2016-012429), 2016-11-03
Supplement: bmjopen-2016-012429supp_appendix1.pdf [file bmjopen-2016-012429supp_appendix1.pdf]

## Appendix 1

MEDLINE search strategy

1. hypertension/ or hypertension, or exp hypertension,
2. hypertens\*.tw.
3. 1 or 2
4. Blood Pressure/
5. exp Blood Pressure Determination/
6. exp Sphygmomanometers/
7. (sphygmomanometer\* or (blood pressure adj3 (monitor\* or determin\*))).tw.
8. 6 or 5 or 4 or 7
9. Ambulatory Care/
10. ambulatory care facilities/ or outpatient clinics, hospital/
11. Family Practice/
12. Monitoring, Ambulatory/
13. Physicians, Family/
14. "Referral and Consultation"/
15. (family practi\* or general practi\* or family physician\* or primary care).tw.
16. (ambula\* adj5 care).tw.
17. (referral\* adj5 consultat\*).tw.
18. 13 or 9 or 11 or 14 or 17 or 16 or 10 or 12 or 15
19. 8 and 3
20. 8 and 3 and 18
21. diagnos\*.tw.
22. (physical exam\* or clinical exam\*).tw.
23. stress test\*.tw.
24. (sensitiv\* or specific\* or predictive value\* or ppv or npv or likelihood ratio\* or interobserver or intraobserver).tw. 25. (accuracy or precision or reliability or validity).tw.
26. "Diagnostic Techniques and Procedures"/
27. exp Diagnostic Errors/
28. Diagnostic Tests, Routine/
29. exp "Sensitivity and Specificity"/
30. diagnosis/ or diagnosis, differential/
31. 25 or 23 or 30 or 26 or 24 or 22 or 28 or 21 or 29 or 27
32. 31 and 20

- 33. Hypertension/di [Diagnosis]
- 34. Hypertension, Malignant/di [Diagnosis]
- 35. 33 or 34
- 36. 8 and 18
- 37. 35 and 36
- 38. limit 20 to "diagnosis  
(sensitivity)"
- 39. 38 or 32 or 37
- 40. Obes\*
- 41. Large arm
- 42. Large cuff
- 43. 40 or 41 or 42
- 44. 39 and 43
