# Supplementary material for: Which cuff should I use? Indirect blood pressure measurement for the diagnosis of hypertension in patients with obesity: a diagnostic accuracy review
Source: PubMed Central journal article supplement — BMJ Open. 2016 Nov 3;6(11):e012429. doi: 10.1136/bmjopen-2016-012429 (PMC5129068; doi:10.1136/bmjopen-2016-012429), 2016-11-03
Supplement: bmjopen-2016-012429supp_appendix2.pdf [file bmjopen-2016-012429supp_appendix2.pdf]

## Appendix 2

Figure 1

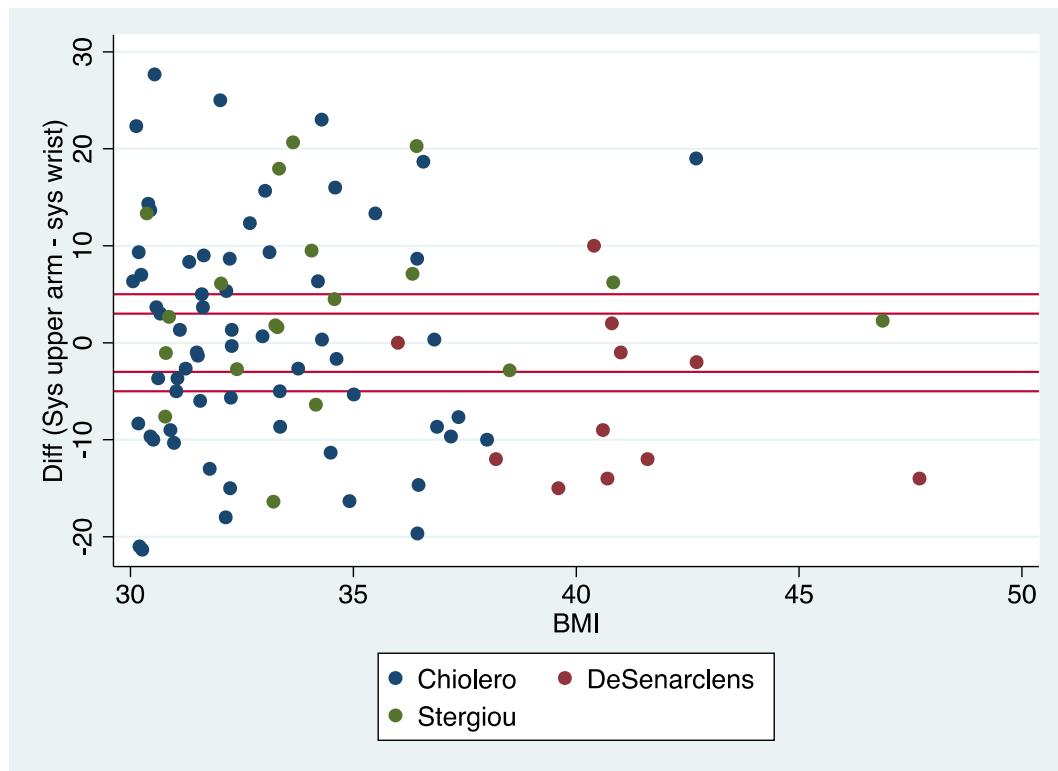

*Difference in systolic blood pressure in wrist and upper arm versus BMI.  $\pm 3$  mmHg [BHS standard] and  $\pm 5$  mmHg [clinically relevant difference] margin of error indicated in red.*

**Figure 2**

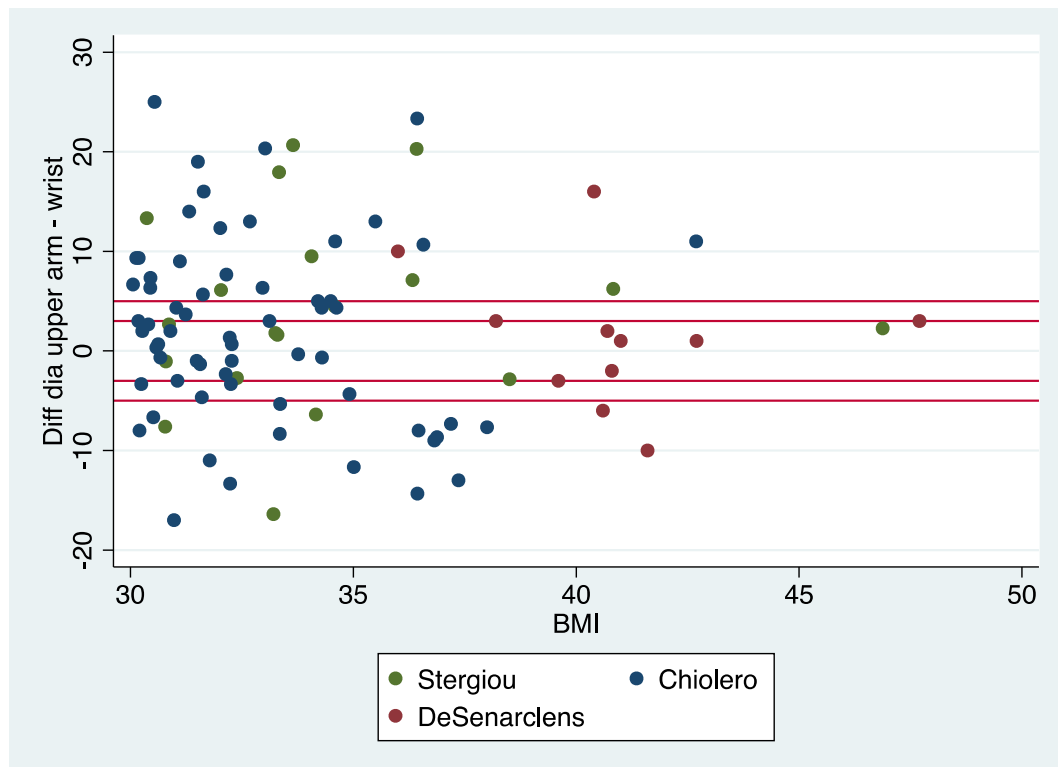

*Difference in diastolic blood pressure in wrist and upper arm versus BMI.  $\pm 3$  mmHg [BHS standard] and  $\pm 5$  mmHg [clinically relevant difference] margin of error indicated in red.*
